# Supplementary material for: Age-related changes in the gene expression profile of antigen-specific mouse CD8+ T cells can be partially reversed by blockade of the BTLA/CD160 pathways during vaccination
Source: PubMed Central journal article supplement (PMC5270668; doi:10.18632/aging.101105), 2016-11-09
Supplement: aging-08-3272-s001.pdf [file aging-08-3272-s001.pdf]

SUPPLEMENTARY MATERIAL

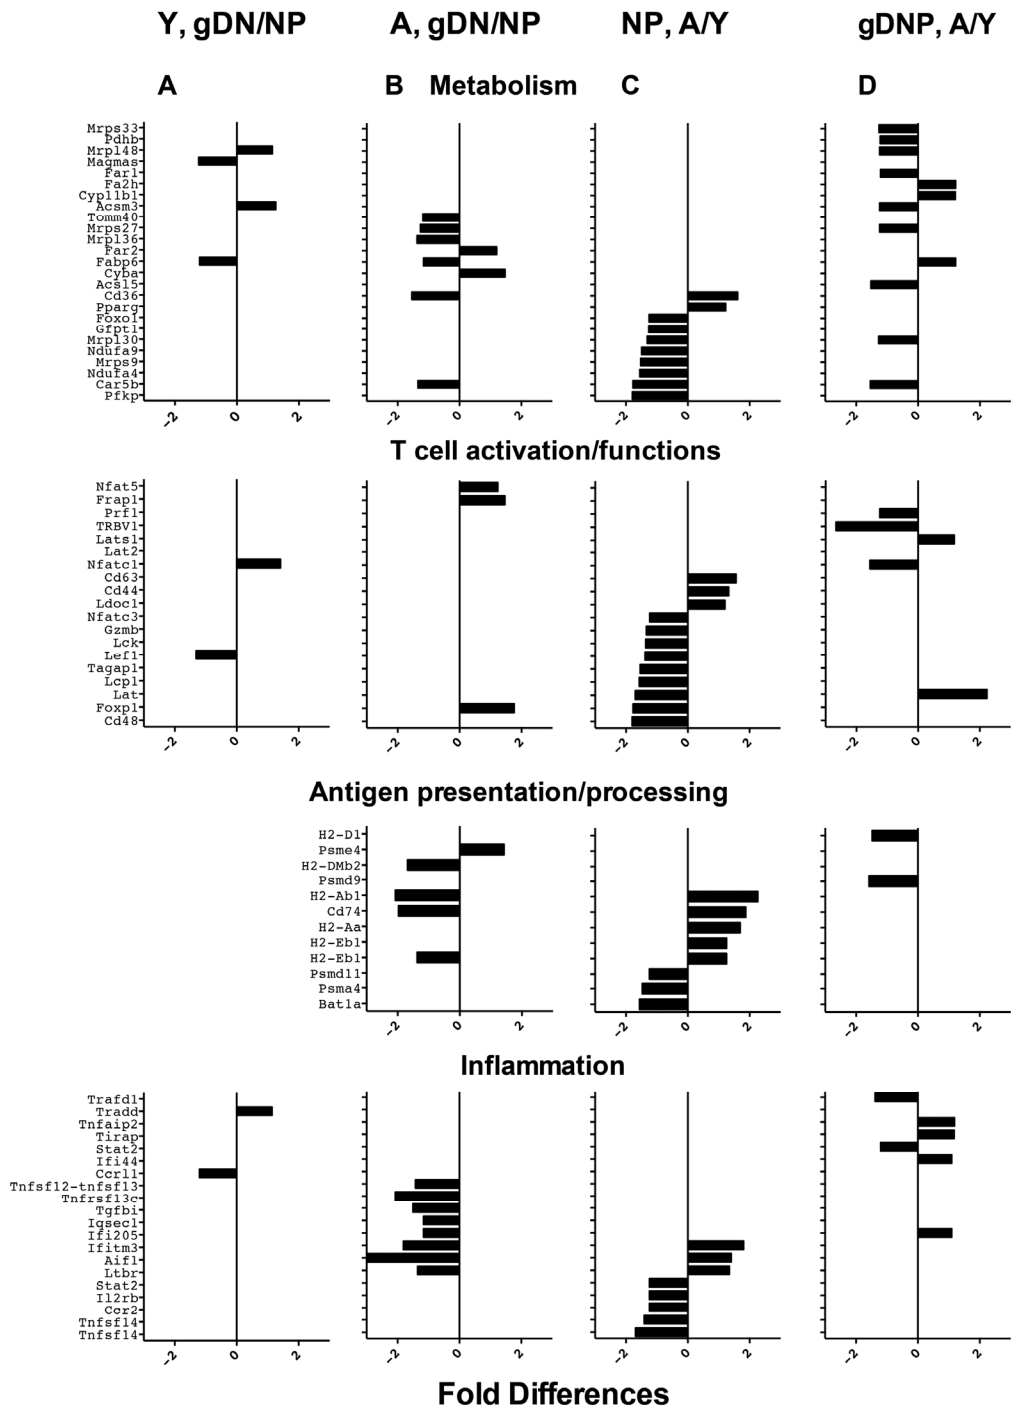

**Supplementary Figure 1.** The bar graphs show fold differences of the indicated transcripts involved in metabolism and various aspects of immune responses comparing in (A) CD8<sup>+</sup> T cells from young AdC68-gDNP-vaccinated mice to those of young AdC68-NP-vaccinated mice, in (B) CD8<sup>+</sup> T cells from aged AdC68-gDNP-vaccinated mice to those of aged AdC68-NP-vaccinated mice in (C) AdC68-NP-immune CD8<sup>+</sup> T cells from the aged to the younger mice and in (D) AdC68gD-NP-immune CD8<sup>+</sup> T cells from the from the aged to the younger mice. Positive values reflect higher expression in younger T cells.

## A, AdC68-gDNP/Y, AdC68-gDNP

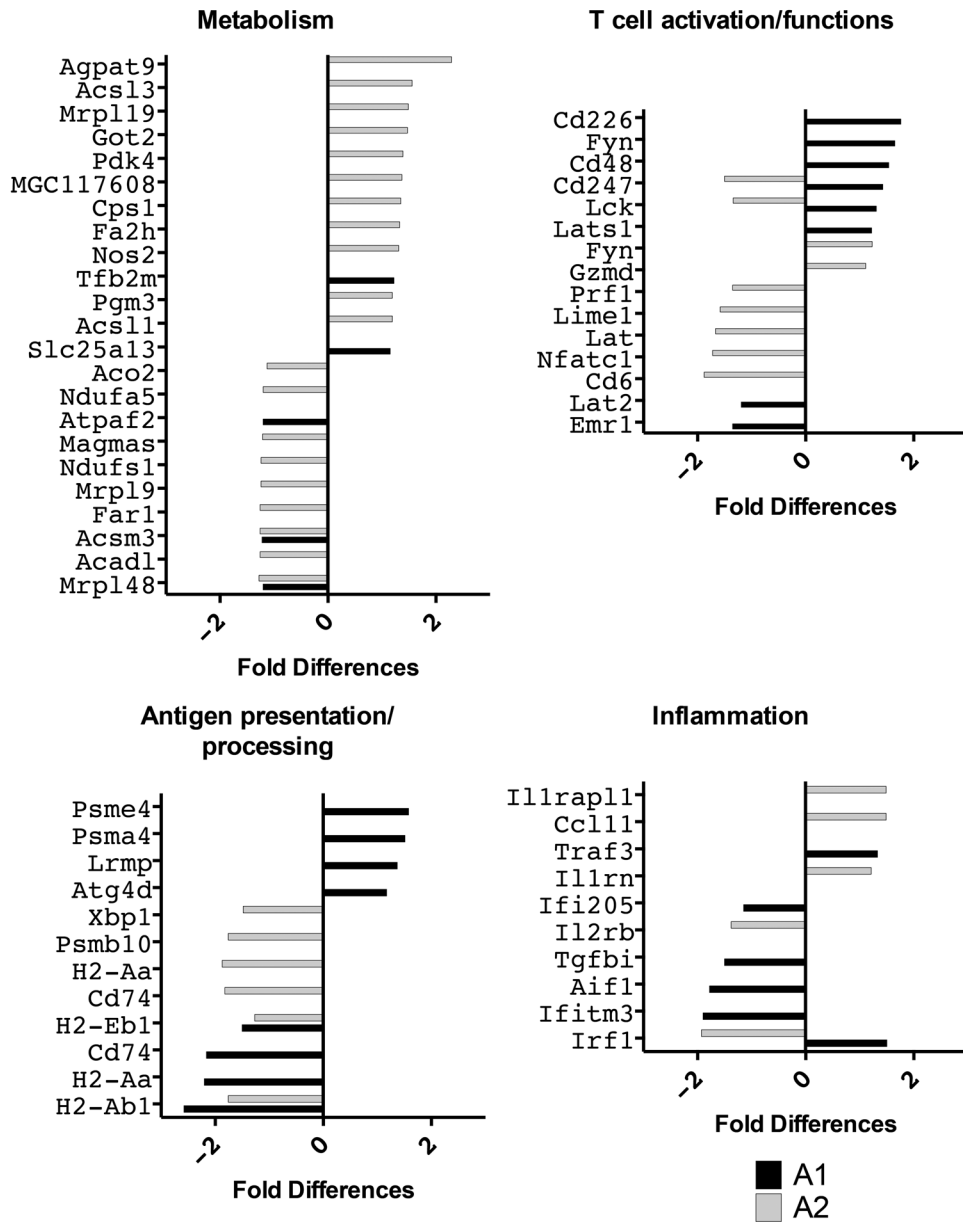

**Supplementary Figure 2.** The bar graphs show fold differences of the indicated transcripts between the two cohorts of CD8<sup>+</sup> T cells from aged AdC68-dDNP immunized mice to CD8<sup>+</sup> T cells from young AdC68-gDNP immunized mice as in Fig 1. Black bars showed fold differences between the A1 group and grey bars reflect data for the A2 group. Positive values reflect higher expression in younger T cells.

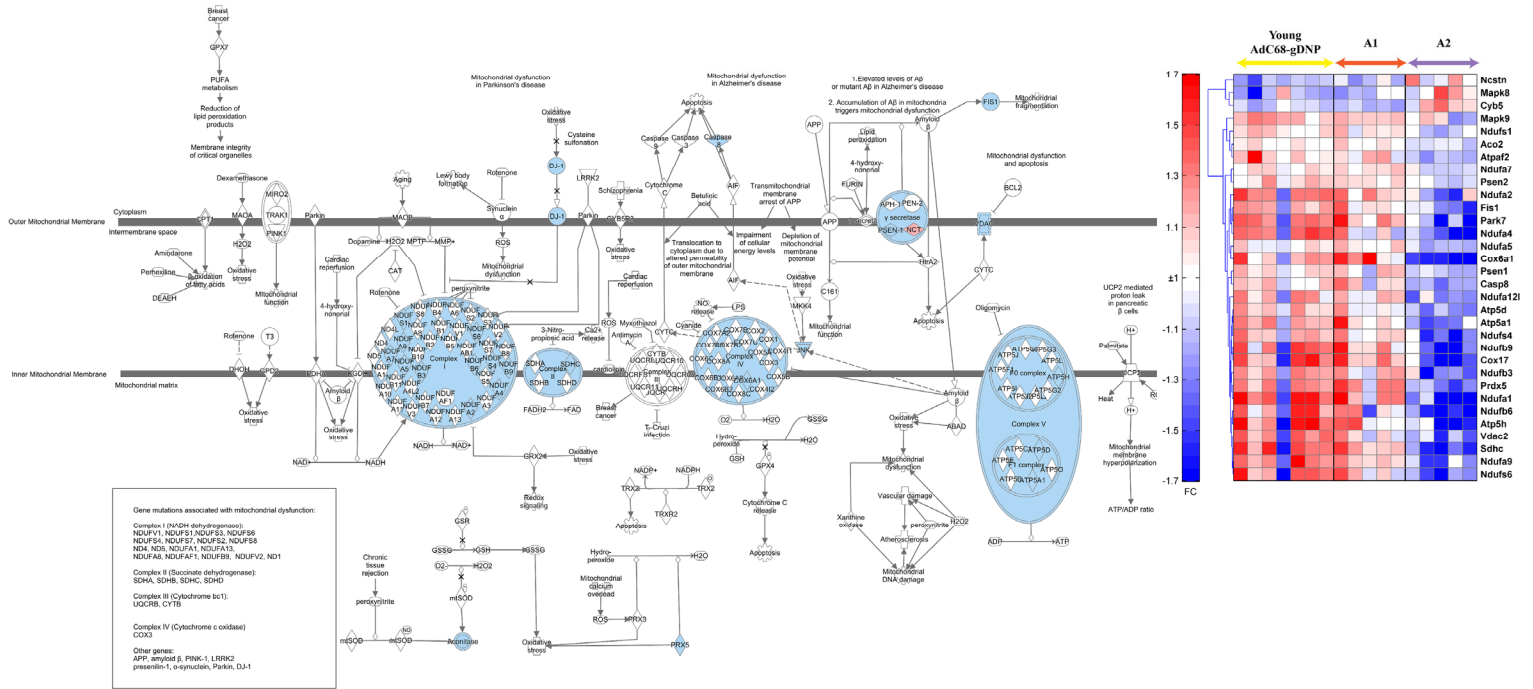

**Supplementary Figure 3.** Gene expression changes between young AdC68-gDNP and A2 mice in the Mitochondrial Dysfunction pathway from Ingenuity Pathway Analysis. Left: Differentially expressed genes between the two groups are shown (red: upregulated in A2; blue: downregulated in A2). Right: Heatmap of the expression of probes within the pathway in young AdC68-gDNP, A1 and A2 mice.

CD28 Signaling in T Helper Cells

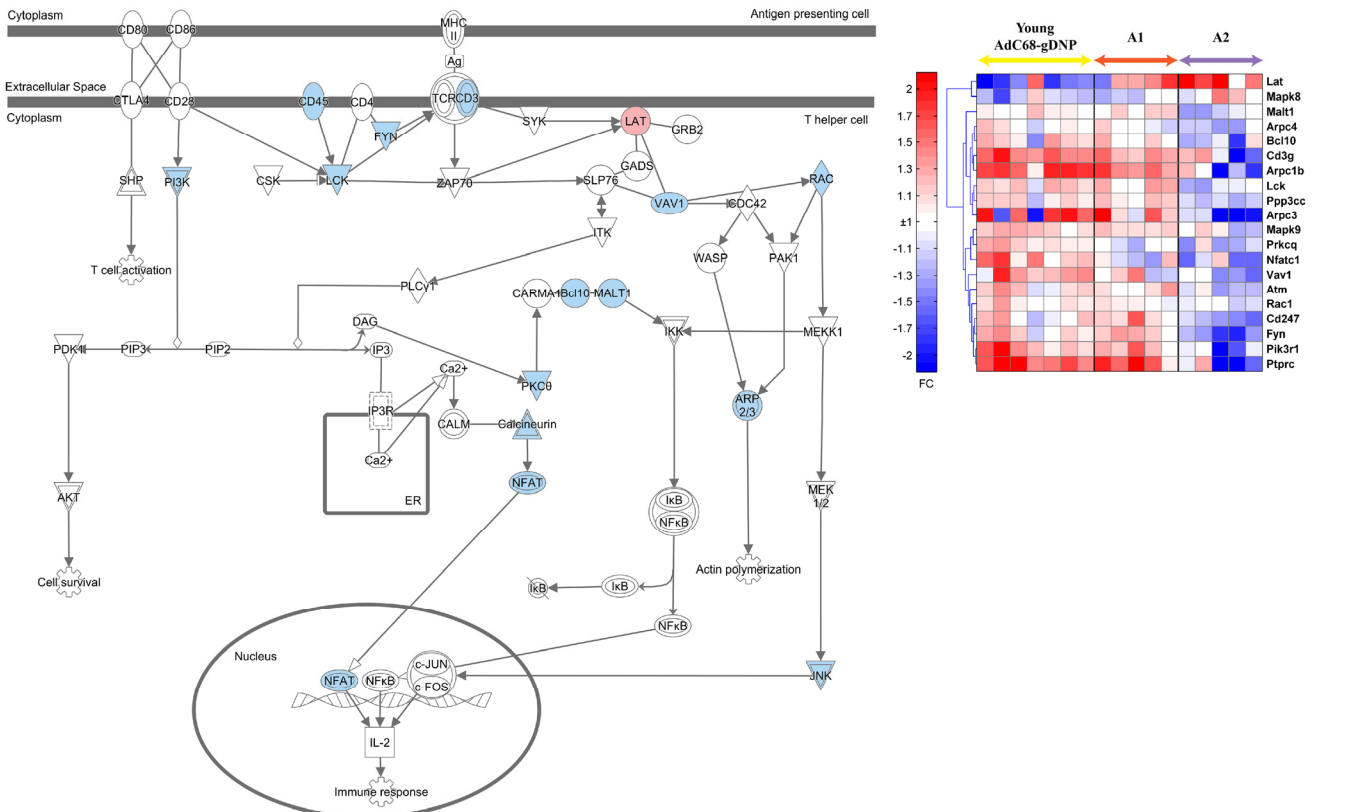

**Supplementary Figure 4.** Gene expression changes between young AdC68-gDNP and A2 mice in the CD28 Signaling in T helper Cells pathway from Ingenuity Pathway Analysis. Left: Differentially expressed genes between the two groups are shown (red: upregulated in A2; blue: downregulated in A2). Right: Heatmap of the expression of probes within the pathway in young AdC68-gDNP, A1 and A2 mice.

## A, AdC68-gDNP/A, AdC68-NP

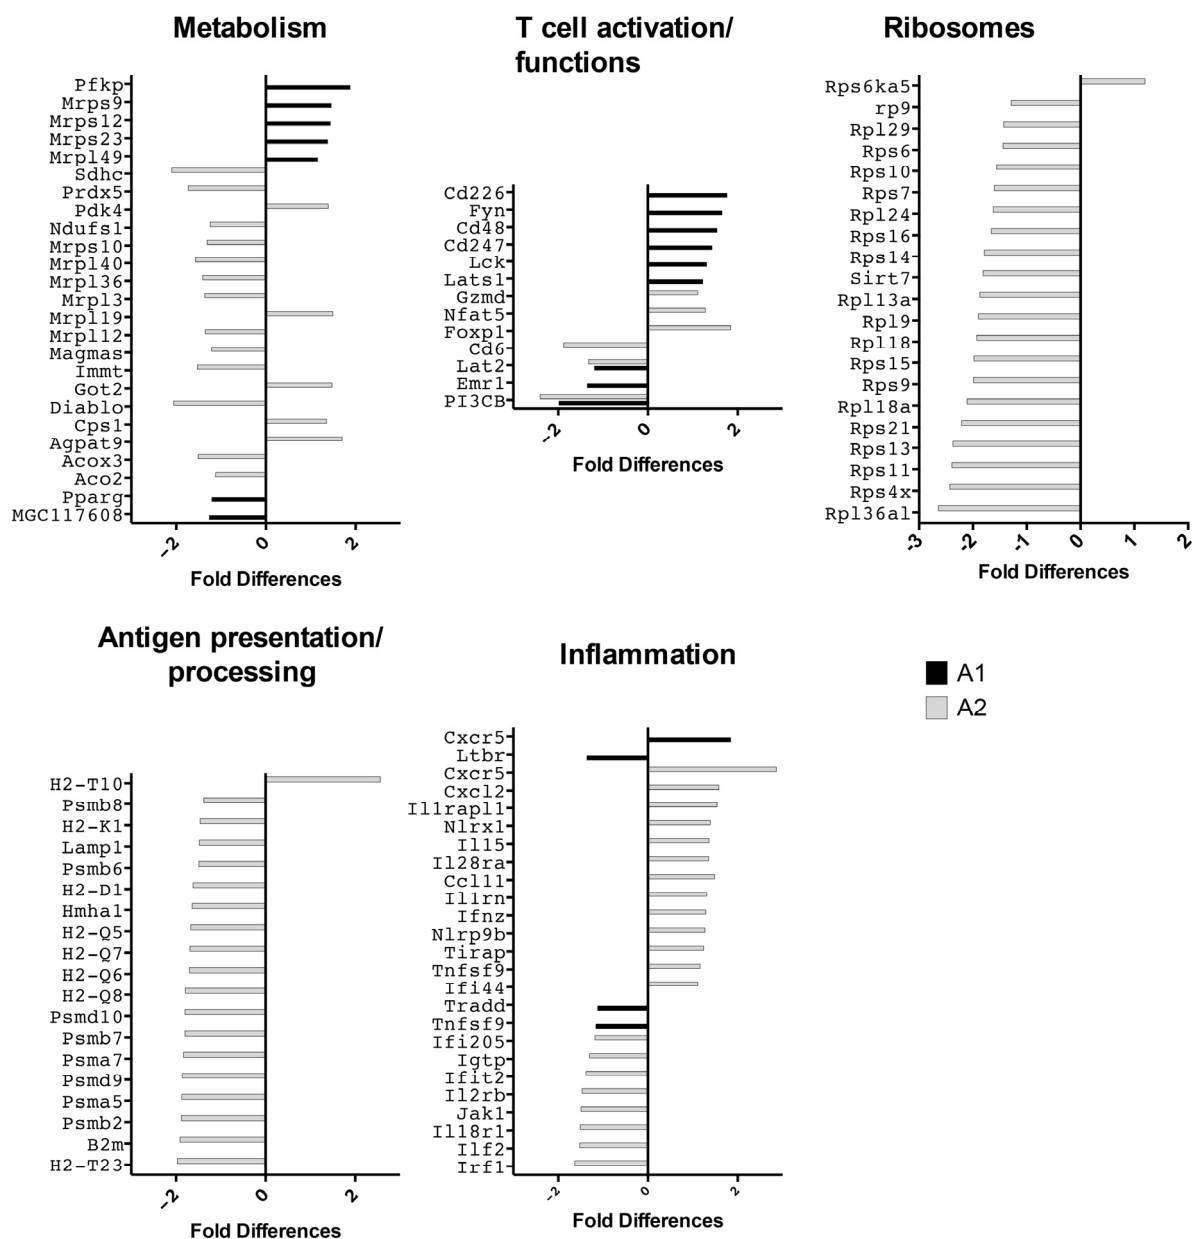

**Supplementary Figure 5.** The bar graphs show fold differences of the indicated transcripts between CD8<sup>+</sup> T cells from aged AdC68-gDNP immunized mice of groups A1 (in black) and A2 (grey) compared to CD8<sup>+</sup> T cells from aged AdC68-NP immunized mice as in Fig 1. Positive values reflect higher expression in CD8<sup>+</sup> T cells from AdC68-gDNP immunized mice.

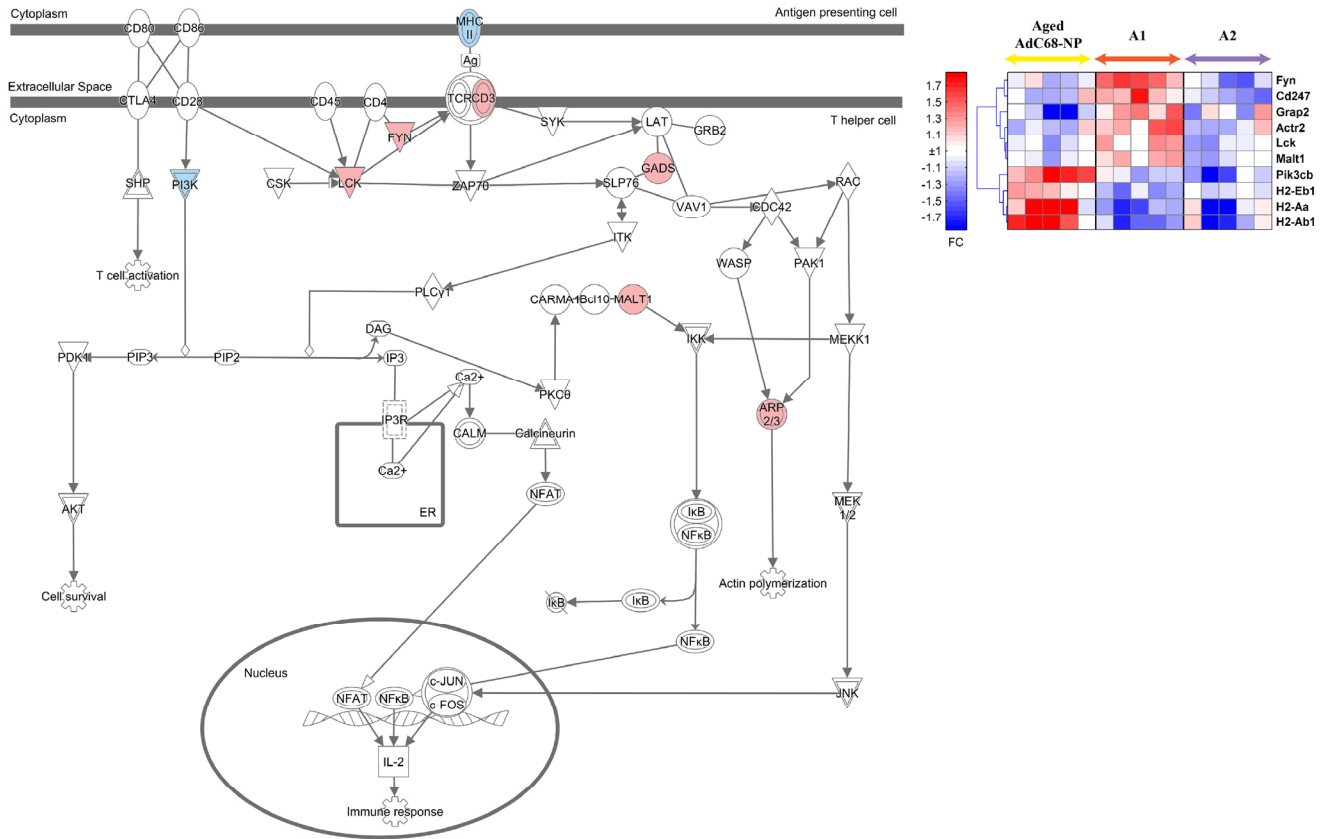

© 2000-2016 QIAGEN. All rights reserved.

**Supplementary Figure 6.** Gene expression changes between aged AdC68-NP and A1 mice in the CD28 Signaling in T helper Cells pathway from Ingenuity Pathway Analysis. Left: Differentially expressed genes between the two groups are shown (red: upregulated in A1; blue: downregulated in A1). Right: Heatmap of the expression of probes within the pathway in aged AdC68-NP, A1 and A2 mice.

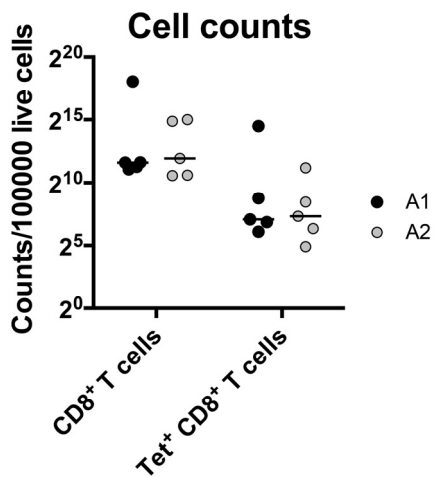

**Supplementary Figure 7.** The figure shows numbers of CD8<sup>+</sup> T cells and NP-tetramer positive CD8<sup>+</sup> T cells normalized to 10<sup>5</sup> live lymphoid cells that were analyzed from AdC68-gDNP-immunized mice of the A1 and A2 groups based on results obtained during cell sorting.

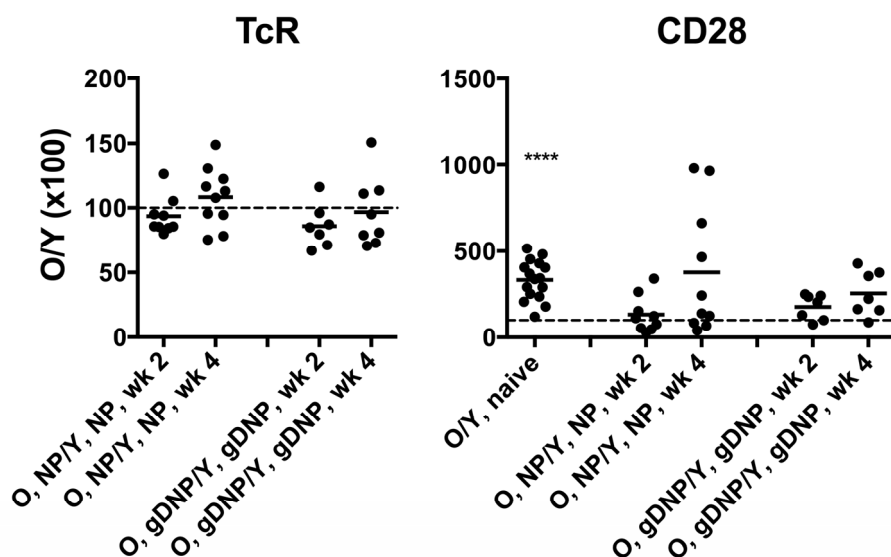

**Supplementary Figure 8.** The graphs show a comparison for the mean fluorescent intensity (MFI) for staining with the NP tetramer (TcR) and an antibody to CD28 on CD8<sup>+</sup> T cells from aged as compared to young mice. Tetramer-positive cells from AdC68-NP (NP)- or AdC68-gDNP (gDNP)-immunized mice were compared at 2 and 4 weeks after immunization. \*\*\*\* indicates a significant difference between the two comparison groups with a p-value <0.0001 (by multiple t-test with type 1 error correction). The dashed line is drawn at 100.

## SUPPLEMENTARY RESULTS

### Confirmatory studies

We selected 6 transcripts that showed significant differences in expression in the comparison of samples from aged mice immunized with AdC68-NP or AdC68-gDNP and compared levels of their expression by quantitative real time PCR. While the PCR expression data for only 1 of the 6 genes (Sirpa) reached statistical significance, all 6 genes displayed the same direction of fold change and similar magnitude of increase as those of the arrays, as shown in Suppl. Fig. 6

## SUPPLEMENTARY METHODS

### Analysis by quantitative PCR

Six genes (Klrg1, Lyz, Cd163, Sirpa, Pik3cb, Aif1, Lat2) that were differentially expressed between samples from aged AdC68-NP and aged AdC68-gDNP-immunized mice were selected for analysis using PCR. RNA samples, were isolated using ThermoFisher Scientific RNAqueous®-Micro Kit. 20ng of total RNA was used to generate cDNA using MessageBooster

cDNA Synthesis Kit (Epicentre, Manalapan Township, NJ). Quantitative RT-PCR was performed on a ThermoFisher (Waltham, MA) Scientific 7900 HT Fast Real-Time PCR System with RT2 SYBR Green Master Mixes, according to the manufacturer. Information for the sequences of the primers from Qiagen (Hilden, Germany) used for the 6 selected genes are listed in Suppl. Table 9. The housekeeping gene Txn1 was used as a loading control. Samples were run in triplicates and 4 replicates were used for each group.

For each gene, triplicates were first averaged, then Ct values were converted to gene expression by calculating the  $2^{-\Delta Ct}$  value, where  $\Delta Ct = Ct \text{ gene of interest} - Ct \text{ of internal control}$ . A t-test was used to compare samples from aged AdC68-gDNP- versus aged AdC68-NP-immunized mice.

**Supplementary Table 1.** Pathways and functions enriched for genes differentially expressed between young AdC68-NP and young AdC68-gDNP mice

| IPA Canonical Pathways          | P-Value  | Benjamini | # of Genes |
|---------------------------------|----------|-----------|------------|
| SAPK/JNK Signaling              | 5.89E-04 | 3.80E-02  | 4          |
| Wnt/ $\beta$ -catenin Signaling | 6.17E-04 | 3.80E-02  | 5          |

**Supplementary Table 2.** Pathways and functions enriched for genes differentially expressed between aged AdC68-NP and aged AdC68-gDNP mice

| IPA Canonical Pathways†                                   | P-Value  | Benjamini | # of Genes |
|-----------------------------------------------------------|----------|-----------|------------|
| Nur77 Signaling in T Lymphocytes                          | 2.29E-05 | 6.92E-03  | 7          |
| IL-4 Signaling                                            | 1.35E-04 | 1.70E-02  | 7          |
| Cytotoxic T Lymphocyte-mediated Apoptosis of Target Cells | 1.70E-04 | 1.70E-02  | 6          |
| Calcium-induced T Lymphocyte Apoptosis                    | 4.37E-04 | 3.31E-02  | 6          |
| Role of NFAT in Regulation of the Immune Response         | 5.89E-04 | 3.39E-02  | 10         |
| PKC $\theta$ Signaling in T Lymphocytes                   | 6.76E-04 | 3.39E-02  | 8          |
| Graft-versus-Host Disease Signaling                       | 8.51E-04 | 3.47E-02  | 5          |
| Role of NFAT in Cardiac Hypertrophy                       | 1.02E-03 | 3.47E-02  | 10         |
| Dendritic Cell Maturation                                 | 1.15E-03 | 3.47E-02  | 9          |
| Amyotrophic Lateral Sclerosis Signaling                   | 1.32E-03 | 3.47E-02  | 7          |

† Top ten significant pathways are listed

**Supplementary Table 3.** Pathways and functions enriched for genes differentially expressed between young AdC68-NP and aged AdC68-NP mice

| IPA Canonical Pathways                                    | P-Value  | Benjamini | # of Genes |
|-----------------------------------------------------------|----------|-----------|------------|
| CD28 Signaling in T Helper Cells                          | 1.45E-05 | 2.14E-03  | 11         |
| PKC $\theta$ Signaling in T Lymphocytes                   | 1.45E-05 | 2.14E-03  | 11         |
| iCOS-iCOSL Signaling in T Helper Cells                    | 2.00E-04 | 2.00E-02  | 9          |
| Cytotoxic T Lymphocyte-mediated Apoptosis of Target Cells | 3.89E-04 | 2.40E-02  | 6          |
| CTLA4 Signaling in Cytotoxic T Lymphocytes                | 3.98E-04 | 2.40E-02  | 8          |
| Calcium-induced T Lymphocyte Apoptosis                    | 9.55E-04 | 4.79E-02  | 6          |
| IPA Biological Functions                                  | P-Value  | Benjamini | # of Genes |
| Gene Expression                                           | 9.72E-07 | 1.66E-03  | 67         |
| RNA Post-Transcriptional Modification                     | 4.91E-05 | 2.10E-02  | 17         |
| Cell Cycle                                                | 1.61E-04 | 4.42E-02  | 33         |
| Cancer                                                    | 3.48E-04 | 4.42E-02  | 53         |
| Cellular Development                                      | 3.89E-04 | 4.42E-02  | 30         |
| Cell Death                                                | 4.65E-04 | 4.95E-02  | 48         |

| <b>DAVID Functions†</b>                                                     | <b>P-Value</b> | <b>Benjamini</b> | <b># of Genes</b> |
|-----------------------------------------------------------------------------|----------------|------------------|-------------------|
| SP_PIR_KEYWORDS: phosphoprotein                                             | 7.51E-07       | 2.13E-04         | 196               |
| GO BP: leukocyte activation                                                 | 2.26E-04       | 2.83E-02         | 16                |
| GO BP: positive regulation of nitrogen compound metabolic process           | 1.24E-04       | 2.87E-02         | 26                |
| GO BP: positive regulation of biosynthetic process                          | 2.22E-04       | 3.01E-02         | 26                |
| GO BP: cell activation                                                      | 1.74E-04       | 3.14E-02         | 17                |
| GO BP: positive regulation of transcription                                 | 1.17E-04       | 3.16E-02         | 24                |
| GO BP: positive regulation of gene expression                               | 1.56E-04       | 3.17E-02         | 24                |
| GO BP: positive regulation of transcription from RNA polymerase II promoter | 2.20E-04       | 3.25E-02         | 19                |
| GO BP: positive regulation of macromolecule biosynthetic process            | 1.03E-04       | 3.34E-02         | 26                |
| GO BP: positive regulation of cellular biosynthetic process                 | 2.11E-04       | 3.42E-02         | 26                |

† Top ten significant functions are listed

**Supplementary Table 4.** Top 100 differentially expressed probes between young AdC68-NP, young AdC68-gDNP, aged AdC68-NP and aged AdC68-gDNP, ranked according to hierarchical clustering in heatmap (Figure 2).

| <b>Illumina ID</b> | <b>Accession</b> | <b>Gene Name</b>                                                          | <b>Symbol</b> |
|--------------------|------------------|---------------------------------------------------------------------------|---------------|
| ILMN_2806700       | NM_007806        | cytochrome b-245, alpha polypeptide                                       | Cyba          |
| ILMN_1259185       | NM_172991        | RIKEN cDNA C030048B08 gene                                                | C030048B08Rik |
| ILMN_3159185       | NM_213616        | ATPase, Ca <sup>++</sup> transporting, plasma membrane 4                  | Atp2b4        |
| ILMN_2594066       | NM_025620        | RIKEN cDNA 2210417D09 gene                                                | 2210417D09Rik |
| ILMN_2648704       | NM_198429        | nuclear factor of activated T-cells, cytoplasmic, calcineurin-dependent 1 | Nfatc1        |
| ILMN_1260262       | NM_027098        | mitochondrial ribosomal protein L30                                       | Mrpl30        |
| ILMN_1258998       | NM_025456        | E2F-associated phosphoprotein                                             | Eapp          |
| ILMN_1228498       | NM_152822        | LAS1-like (S. cerevisiae)                                                 | Las11         |
| ILMN_2615041       | NM_054078        | bromodomain adjacent to zinc finger domain, 2A                            | Baz2a         |
| ILMN_2424866       | NM_030131        | cornichon homolog 4 (Drosophila)                                          | Cnih4         |
| ILMN_2939702       | NM_025522        | dehydrogenase/reductase (SDR family) member 7                             | Dhrs7         |
| ILMN_2723907       | NM_027213        | mediator of RNA polymerase II transcription, subunit 6 homolog (yeast)    | Med6          |
| ILMN_2624782       | NM_001005509     | eukaryotic translation initiation factor 2a                               | Eif2a         |
| ILMN_3071525       | NM_178687        | CD226 antigen                                                             | Cd226         |
| ILMN_3007669       | NM_019693        | HLA-B-associated transcript 1A                                            | Bat1a         |
| ILMN_2659528       | NM_013836        | transcription factor 20                                                   | Tcf20         |
| ILMN_1236290       | NM_011808        | E26 avian leukemia oncogene 1, 5' domain                                  | Ets1          |
| ILMN_2610609       | NM_027238        | tetratricopeptide repeat domain 39B                                       | Ttc39b        |
| ILMN_1256630       | NM_001029889     | gene model 608                                                            | Gm608         |
| ILMN_3162184       | NM_001033201     | expressed sequence AU014645                                               | AU014645      |
| ILMN_2444432       | AE000663         | T cell receptor beta variable 1 207                                       | TRBV1         |
| ILMN_1224128       | NM_010902        | nuclear factor, erythroid derived 2, like 2                               | Nfe2l2        |
| ILMN_3065779       | NM_027696        | mesoderm induction early response 1 homolog (Xenopus laevis)              | Mier1         |
| ILMN_2837195       | NM_026558        | RIKEN cDNA 6720467C03 gene                                                | 6720467C03Rik |
| ILMN_2728189       | NM_173747        | G patch domain and KOW motifs                                             | Gpkow         |
| ILMN_2642969       | XR_032069        | PREDICTED: similar to Centaurin, beta 1                                   | LOC100045877  |
| ILMN_2677876       | NM_138630        | Rho GTPase activating protein 4                                           | Arhgap4       |
| ILMN_2462151       | NM_199011        | diacylglycerol kinase, theta                                              | Dgkq          |



| <b>Illumina ID</b> | <b>Accession</b> | <b>Gene Name</b>                                                                | <b>Symbol</b>  |
|--------------------|------------------|---------------------------------------------------------------------------------|----------------|
| ILMN_1215134       | NM_198647        | TBC1 domain family, member 22B                                                  | Tbc1d22b       |
| ILMN_3107690       | NM_028527        | RIKEN cDNA 1700047117 gene 1                                                    | 1700047117Rik1 |
| ILMN_1225210       | AK037664         | protein kinase C, theta                                                         | Prkcq          |
| ILMN_1225801       | AK077734         | reticulocalbin 2                                                                | Rcn2           |
| ILMN_2794825       | NM_153083        | thiamine triphosphatase                                                         | Thtpa          |
| ILMN_2678547       | NM_008866        | lysophospholipase 1                                                             | Lypla1         |
| ILMN_1260506       | NM_011063        | phosphoprotein enriched in astrocytes 15A                                       | Pea15a         |
| ILMN_2605268       | NM_033526        | ubiquilin 4                                                                     | Ubqln4         |
| ILMN_2548754       | AK015797         | n/a                                                                             | 4930515K21Rik  |
| ILMN_1236131       | NM_198831        | mitochondrial ribosomal protein L48                                             | Mrpl48         |
| ILMN_1259355       | NM_134033        | coiled-coil domain containing 117                                               | Ccdc117        |
| ILMN_2836855       | NM_001033251     | G protein-coupled receptor 174                                                  | Gpr174         |
| ILMN_1227420       | XR_031186        | PREDICTED: similar to RGD1359202 protein                                        | LOC100045341   |
| ILMN_1232020       | XM_618920        | PREDICTED: hypothetical LOC544808                                               | LOC544808      |
| ILMN_1228461       | XM_110818        | n/a                                                                             | LOC192690      |
| ILMN_2416813       | n/a              | n/a                                                                             | 4122401K19Rik  |
| ILMN_3015589       | NM_008264        | homeo box A13                                                                   | Hoxa13         |
| ILMN_2551741       | AK018737         | n/a                                                                             | 0610010105Rik  |
| ILMN_1244257       | XM_140912        | n/a                                                                             | LOC227934      |
| ILMN_1231163       | XR_032090        | PREDICTED: similar to transforming acidic coiled-coil containing protein 1 long | LOC245600      |
| ILMN_1225242       | AK077861         | n/a                                                                             | 5930426L19Rik  |
| ILMN_1235445       | AK084831         | nitrogen fixation gene 1 (S. cerevisiae)                                        | Nfs1           |
| ILMN_1251080       | XM_354743        | similar to fatty acyl elongase                                                  | LOC380835      |
| ILMN_2779858       | NM_025393        | S100 calcium binding protein A14                                                | S100a14        |
| ILMN_3106849       | NM_001024717     | galactose-3-O-sulfotransferase 3                                                | Gal3st3        |
| ILMN_2900617       | NM_053254        | transducin-like enhancer of split 6, homolog of Drosophila E(spl)               | Tle6           |
| ILMN_2674712       | NM_173189        | microcephaly, primary autosomal recessive 1                                     | Mcp1           |
| ILMN_2682162       | NM_177410        | B-cell leukemia/lymphoma 2                                                      | Bcl2           |
| ILMN_2674666       | XM_987671        | PREDICTED: similar to Ig kappa chain V-V region MPC11 precursor                 | LOC676136      |
| ILMN_1239958       | NM_139223        | defensin beta 13                                                                | Defb13         |
| ILMN_1237656       | NM_017395        | n/a                                                                             | Rfx5           |
| ILMN_1238193       | AK078731         | n/a                                                                             | 7530433C13Rik  |
| ILMN_2668425       | NM_007858        | diaphanous homolog 1 (Drosophila)                                               | Diap1          |
| ILMN_2877581       | NM_172883        | major facilitator superfamily domain containing 7                               | Mfsd7          |
| ILMN_1225565       | NM_010512        | insulin-like growth factor 1                                                    | Igf1           |
| ILMN_1238970       | AK081994         | n/a                                                                             | C130092F19Rik  |
| ILMN_1215644       | XR_032896        | PREDICTED: similar to Eukaryotic translation initiation factor 2 alpha kinase 3 | LOC100047634   |
| ILMN_1226525       | NM_207105        | histocompatibility 2, class II antigen A, beta 1                                | H2-Ab1         |
| ILMN_2527381       | XM_140905        | similar to Cathepsin B precursor (Cathepsin B1)                                 | LOC241385      |
| ILMN_1247377       | NM_010821        | macrophage expressed gene 1                                                     | Mpeg1          |
| ILMN_1239102       | NM_010382        | histocompatibility 2, class II antigen E beta                                   | H2-Eb1         |
| ILMN_2736783       | NM_177715        | potassium channel tetramerisation domain containing 12                          | Kctd12         |
| ILMN_2985969       | NM_009773        | budding uninhibited by benzimidazoles 1 homolog, beta (S. cerevisiae)           | Bub1b          |
| ILMN_3112011       | NM_130447        | dual specificity phosphatase 16                                                 | Dusp16         |
| ILMN_2777034       | NM_139138        | n/a                                                                             | Emr4           |
| ILMN_2658501       | NM_025378        | interferon induced transmembrane protein 3                                      | Ifitm3         |
| ILMN_2734729       | NM_010378        | histocompatibility 2, class II antigen A, alpha                                 | H2-Aa          |
| ILMN_1226525       | NM_207105        | histocompatibility 2, class II antigen A, beta 1                                | H2-Ab1         |

| Illumina ID  | Accession    | Gene Name                                                                                                                                 | Symbol       |
|--------------|--------------|-------------------------------------------------------------------------------------------------------------------------------------------|--------------|
| ILMN_2607675 | XM_918601    | PREDICTED: similar to MHC class II antigen beta chain                                                                                     | LOC641240    |
| ILMN_2675261 | NM_011528    | transaldolase 1                                                                                                                           | Taldol       |
| ILMN_1246056 | NM_001038664 | guanine nucleotide binding protein (G protein), gamma transducing activity polypeptide 2                                                  | Gngt2        |
| ILMN_1246056 | NM_001038664 | guanine nucleotide binding protein (G protein), gamma transducing activity polypeptide 2                                                  | Gngt2        |
| ILMN_2666007 | NM_022325    | cathepsin Z                                                                                                                               | Ctsz         |
| ILMN_2839569 | NM_022325    | cathepsin Z                                                                                                                               | Ctsz         |
| ILMN_2834379 | NM_009369    | transforming growth factor, beta induced                                                                                                  | Tgfb1        |
| ILMN_2710382 | NM_008172    | glutamate receptor, ionotropic, NMDA2D (epsilon 4)                                                                                        | Grin2d       |
| ILMN_1253938 | AK019821     | homeodomain interacting protein kinase 2                                                                                                  | Hipk2        |
| ILMN_1257575 | NM_009976    | cystatin C                                                                                                                                | Cst3         |
| ILMN_2722996 | NM_007547    | signal-regulatory protein alpha                                                                                                           | Sirpa        |
| ILMN_1218123 | NM_019467    | allograft inflammatory factor 1                                                                                                           | Aif1         |
| ILMN_1230708 | NM_199311    | C-type lectin domain family 4, member a1                                                                                                  | Clec4a1      |
| ILMN_2738837 | NM_022988    | Ngg1 interacting factor 3-like 1 (S. pombe)                                                                                               | Nif311       |
| ILMN_2781798 | NM_001033297 | gene model 561                                                                                                                            | Gm561        |
| ILMN_2680549 | NM_029094    | phosphatidylinositol 3-kinase, catalytic, beta polypeptide                                                                                | Pik3cb       |
| ILMN_2729198 | BC048004     | formin-like 2 (S)                                                                                                                         | Fmn12        |
| ILMN_2770270 | NM_183286    | dehydrogenase/reductase (SDR family) member 13                                                                                            | Dhrs13       |
| ILMN_2826304 | NM_008375    | fatty acid binding protein 6, ileal (gastrotropin)                                                                                        | Fabp6        |
| ILMN_1221256 | NM_152839    | immunoglobulin joining chain                                                                                                              | Igj          |
| ILMN_2684370 | XM_132633    | immunoglobulin kappa constant                                                                                                             | Igk-C        |
| ILMN_2704562 | XM_001476703 | PREDICTED: similar to Chain L, Structural Basis Of Antigen Mimicry In A Clinically Relevant Melanoma Antigen System, transcript variant 3 | LOC100047628 |
| ILMN_2744657 | XM_354710    | immunoglobulin heavy constant mu                                                                                                          | Igh-6        |
| ILMN_2744660 | XM_354710    | immunoglobulin heavy constant mu                                                                                                          | Igh-6        |

**Supplementary Table 5.** Pathways and functions enriched for genes differentially expressed between A1 and young AdC68-gDNP mice

| IPA Biological Functions                             | P-Value  | Benjamini | # of Genes |
|------------------------------------------------------|----------|-----------|------------|
| Cell Death and Survival                              | 1.89E-05 | 2.88E-02  | 22         |
| Cell Cycle                                           | 1.05E-04 | 4.01E-02  | 11         |
| Embryonic Development                                | 1.05E-04 | 4.01E-02  | 16         |
| Hair and Skin Development and Function               | 1.05E-04 | 4.01E-02  | 3          |
| Renal and Urological System Development and Function | 1.05E-04 | 4.01E-02  | 4          |

**Supplementary Table 6.** Pathways and functions enriched for genes differentially expressed between A2 and young AdC68-gDNP mice

| <b>IPA Canonical Pathways†</b>                                      | <b>P-Value</b> | <b>Benjamini</b> | <b># of Genes</b> |
|---------------------------------------------------------------------|----------------|------------------|-------------------|
| Mitochondrial Dysfunction                                           | 1.70E-06       | 6.03E-04         | 32                |
| Integrin Signaling                                                  | 2.40E-06       | 6.03E-04         | 36                |
| Caveolar-mediated Endocytosis Signaling                             | 1.74E-05       | 2.40E-03         | 17                |
| Paxillin Signaling                                                  | 1.95E-05       | 2.40E-03         | 21                |
| mTOR Signaling                                                      | 3.09E-05       | 2.95E-03         | 31                |
| Molecular Mechanisms of Cancer                                      | 3.63E-05       | 2.95E-03         | 50                |
| EIF2 Signaling                                                      | 5.75E-05       | 4.07E-03         | 30                |
| Germ Cell-Sertoli Cell Junction Signaling                           | 7.24E-05       | 4.07E-03         | 27                |
| Regulation of IL-2 Expression in Activated and Anrgic T Lymphocytes | 7.41E-05       | 4.07E-03         | 17                |
| Granzyme B Signaling                                                | 8.91E-05       | 4.47E-03         | 7                 |
| <b>IPA Biological Functions†</b>                                    | <b>P-Value</b> | <b>Benjamini</b> | <b># of Genes</b> |
| RNA Post-Transcriptional Modification                               | 7.75E-13       | 1.11E-08         | 69                |
| Cell Death and Survival                                             | 2.37E-11       | 1.69E-07         | 519               |
| Organismal Survival                                                 | 9.79E-11       | 4.66E-07         | 356               |
| Cellular Growth and Proliferation                                   | 2.90E-10       | 8.31E-07         | 588               |
| Cancer                                                              | 3.58E-09       | 8.53E-06         | 1347              |
| Gastrointestinal Disease                                            | 3.58E-09       | 8.53E-06         | 1116              |
| Organismal Injury and Abnormalities                                 | 3.58E-09       | 8.53E-06         | 1364              |
| Gene Expression                                                     | 8.75E-09       | 1.04E-05         | 342               |
| Cellular Development                                                | 1.13E-08       | 1.23E-05         | 483               |
| Hematological System Development and Function                       | 1.13E-08       | 1.23E-05         | 321               |
| <b>DAVID KEGG Pathways</b>                                          | <b>P-Value</b> | <b>Benjamini</b> | <b># of Genes</b> |
| KEGG: Ribosome                                                      | 3.62E-08       | 6.33E-06         | 34                |
| KEGG: Dilated cardiomyopathy                                        | 6.18E-04       | 5.27E-02         | 18                |
| KEGG: Parkinson's disease                                           | 8.70E-04       | 4.95E-02         | 28                |
| KEGG: Arrhythmogenic right ventricular cardiomyopathy (ARVC)        | 1.14E-03       | 4.85E-02         | 17                |
| <b>DAVID Functions†</b>                                             | <b>P-Value</b> | <b>Benjamini</b> | <b># of Genes</b> |
| SP_PIR_KEYWORDS: ribonucleoprotein                                  | 8.91E-08       | 4.39E-05         | 66                |
| SP_PIR_KEYWORDS: acetylation                                        | 5.55E-07       | 1.37E-04         | 358               |
| GO_CC: ribonucleoprotein complex                                    | 1.20E-06       | 6.11E-04         | 95                |
| SP_PIR_KEYWORDS: rna-binding                                        | 8.26E-06       | 1.35E-03         | 91                |
| GO_MF: structural constituent of ribosome                           | 9.04E-06       | 8.44E-03         | 39                |
| SP_PIR_KEYWORDS: ribosomal protein                                  | 1.16E-05       | 1.43E-03         | 44                |
| GO_CC: ribosome                                                     | 3.15E-05       | 7.95E-03         | 46                |
| GO_MF: structural molecule activity                                 | 9.27E-05       | 4.25E-02         | 62                |
| SP_PIR_KEYWORDS: phosphoprotein                                     | 9.83E-05       | 9.62E-03         | 743               |
| SP_PIR_KEYWORDS: ribosome                                           | 1.16E-04       | 9.50E-03         | 12                |

† Top ten significant pathways/functions are listed

**Supplementary Table 7.** Pathways and functions enriched for genes differentially expressed between A1 and aged AdC68-NP mice

| <b>IPA Canonical Pathways</b>                                             | <b>P-Value</b> | <b>Benjamini</b> | <b># of Genes</b> |
|---------------------------------------------------------------------------|----------------|------------------|-------------------|
| CD28 Signaling in T Helper Cells                                          | 7.76E-05       | 1.35E-02         | 10                |
| PKCθ Signaling in T Lymphocytes                                           | 7.76E-05       | 1.35E-02         | 10                |
| <b>IPA Biological Functions†</b>                                          | <b>P-Value</b> | <b>Benjamini</b> | <b># of Genes</b> |
| Cellular Function and Maintenance                                         | 1.44E-08       | 1.00E-04         | 129               |
| Hematological System Development and Function                             | 3.11E-08       | 1.01E-04         | 102               |
| Cell Morphology                                                           | 5.27E-08       | 1.01E-04         | 91                |
| Cellular Development                                                      | 1.50E-07       | 2.08E-04         | 120               |
| Cellular Growth and Proliferation                                         | 1.50E-07       | 2.08E-04         | 154               |
| Lymphoid Tissue Structure and Development                                 | 3.42E-07       | 2.77E-04         | 58                |
| Tissue Morphology                                                         | 3.44E-07       | 2.77E-04         | 77                |
| Organ Morphology                                                          | 4.94E-07       | 3.38E-04         | 71                |
| Hematopoiesis                                                             | 7.44E-07       | 3.38E-04         | 64                |
| Tissue Development                                                        | 7.44E-07       | 3.38E-04         | 96                |
| <b>DAVID Functions</b>                                                    | <b>P-Value</b> | <b>Benjamini</b> | <b># of Genes</b> |
| SP_PIR_KEYWORDS: phosphoprotein                                           | 2.07E-05       | 6.38E-03         | 202               |
| GO_BP: positive regulation of immune system process                       | 2.78E-05       | 4.54E-02         | 17                |
| GO_BP: activation of immune response                                      | 2.90E-05       | 2.39E-02         | 11                |
| GO_BP: immune response-activating cell surface receptor signaling pathway | 5.04E-05       | 2.76E-02         | 8                 |
| GO_BP: immune response-regulating cell surface receptor signaling pathway | 9.47E-05       | 3.88E-02         | 8                 |
| GO_BP: immune response-activating signal transduction                     | 1.39E-04       | 4.53E-02         | 8                 |

† Top ten significant pathways/functions are listed

**Supplementary Table 8.** Pathways and functions enriched for genes differentially expressed between A2 and aged AdC68-NP mice

| <b>IPA Biological Functions†</b>              | <b>P-Value</b> | <b>Benjamini</b> | <b># of Genes</b> |
|-----------------------------------------------|----------------|------------------|-------------------|
| Cellular Development                          | 1.92E-07       | 1.12E-03         | 213               |
| Cellular Growth and Proliferation             | 1.92E-07       | 1.12E-03         | 253               |
| Hematological System Development and Function | 1.92E-07       | 1.12E-03         | 145               |
| Protein Degradation                           | 4.83E-07       | 1.12E-03         | 49                |
| Protein Synthesis                             | 4.83E-07       | 1.12E-03         | 76                |
| Infectious Diseases                           | 1.32E-06       | 2.04E-03         | 107               |
| Cancer                                        | 2.09E-06       | 2.76E-03         | 495               |
| Organismal Injury and Abnormalities           | 2.09E-06       | 2.76E-03         | 505               |
| Cellular Function and Maintenance             | 7.67E-06       | 8.40E-03         | 154               |
| Cell Death and Survival                       | 9.23E-06       | 8.54E-03         | 206               |

† Top ten significant pathways/functions are listed

**Supplementary Table 9.** Pathways and functions enriched for genes differentially expressed between A2 and aged AdC68-NP mice

| <b>Symbol</b>            | <b>Gene Name</b>                                                   | <b>Accession</b> | <b>Qiagen catalog #</b> | <b>amplicon size</b> |
|--------------------------|--------------------------------------------------------------------|------------------|-------------------------|----------------------|
| <b>Test Genes</b>        |                                                                    |                  |                         |                      |
| Rarres1                  | PREDICTED: retinoic acid receptor responder (tazarotene induced) 1 | NM_001164763     | PPM28493A               | 93                   |
| Klr1                     | killer cell lectin-like receptor subfamily G, member 1             | NM_016970        | PPM26071A               | 112                  |
| Lyz 1                    | lysozyme                                                           | NM_013590        | PPM32410C               | 131                  |
| Cd163                    | CD163 antigen                                                      | NM_053094        | PPM06162B               | 147                  |
| Sirpa                    | signal-regulatory protein alpha                                    | NM_007547        | PPM05351E               | 101                  |
| Pik3cb                   | phosphatidylinositol 3-kinase, catalytic, beta polypeptide         | NM_029094        | PPM05089A               | 123                  |
| Aif1                     | allograft inflammatory factor 1                                    | NM_019467        | PPM03752A               | 114                  |
| Lat2                     | linker for activation of T cells family, member 2                  | NM_022964        | PPM59317B               | 85                   |
| <b>Housekeeping Gene</b> |                                                                    |                  |                         |                      |
| Txn1                     | thioredoxin 1                                                      | NM_011660        | PPM35777B               | 129                  |
